# Supplementary material
Source: PubMed Central journal article supplement (PMC2290801)
Supplement: pnas_0709303105_1.pdf [file pnas_0709303105_1.pdf]

A

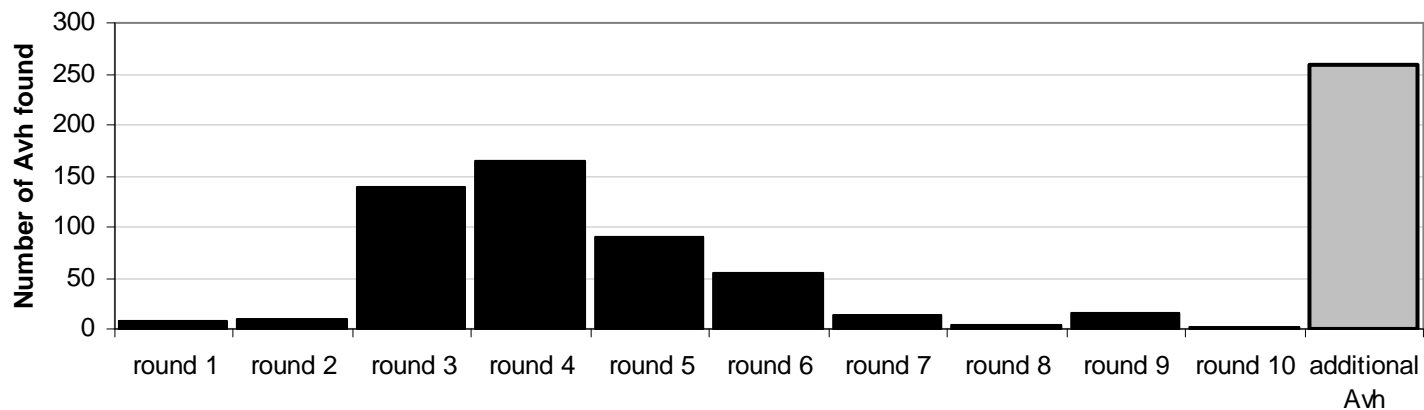

B

|                                         | Avh found by recursive BLAST starting with Avr1b | Additional Avh found by HMM |
|-----------------------------------------|--------------------------------------------------|-----------------------------|
| belong to family with 5 or more members | 329                                              | 159                         |
| belong to family with 4, 3 or 2 members | 156                                              | 45                          |
| belong to singletons                    | 12                                               | 54                          |
| total                                   | 497                                              | 258                         |
