# Supplementary material
Source: PubMed Central journal article supplement (PMC2290801)
Supplement: pnas_0709303105_2.pdf [file pnas_0709303105_2.pdf]

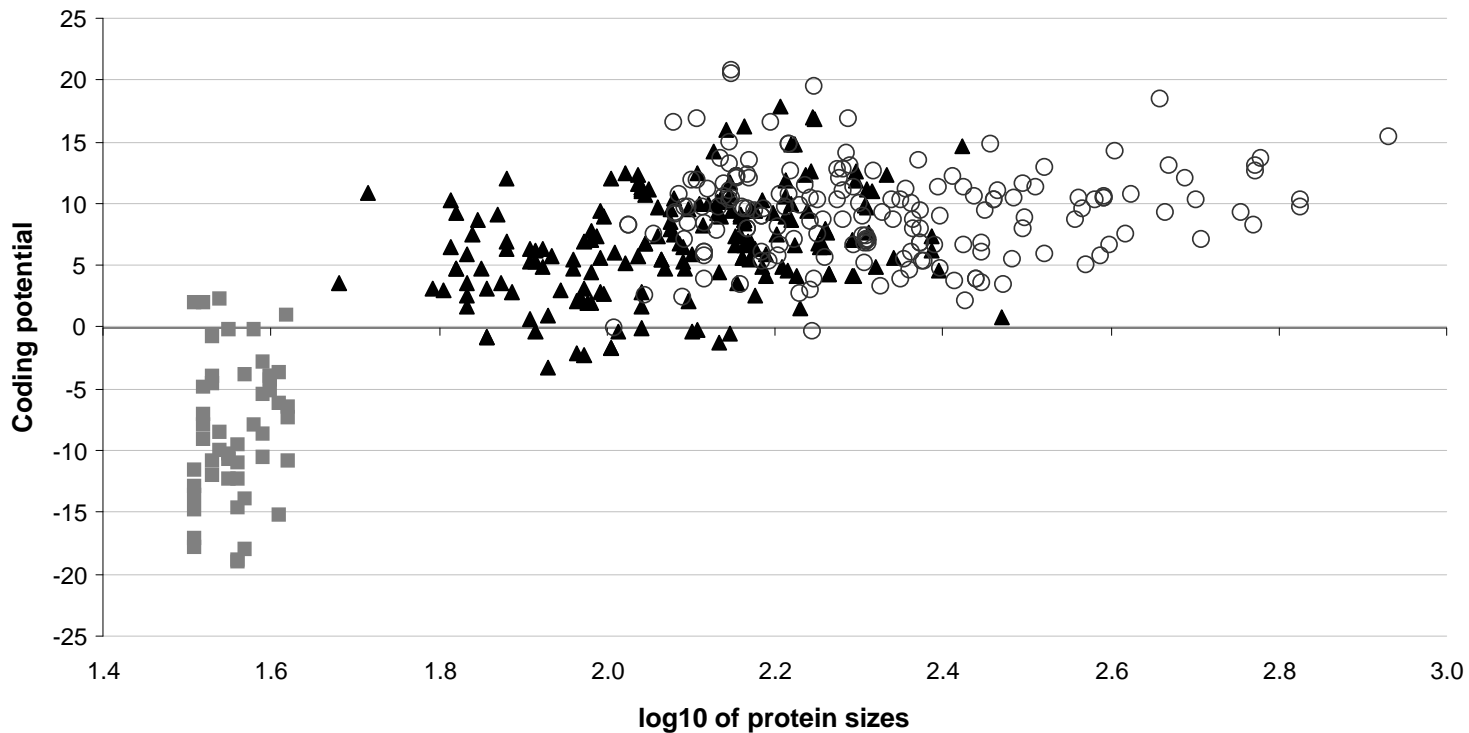

■ non-coding

▲ Avh without W-Y-L motifs

○ Avh with W-Y-L motifs

Mean coding potential

-8.4

6.7

9.3

Median coding potential

-8.7

6.8

9.5
