# Supplementary material
Source: PubMed Central journal article supplement (PMC2290801)

- Occurrence of the motif in translated genomic ORFs with signal peptide  
■ Occurrence of the motif in the permuted dataset

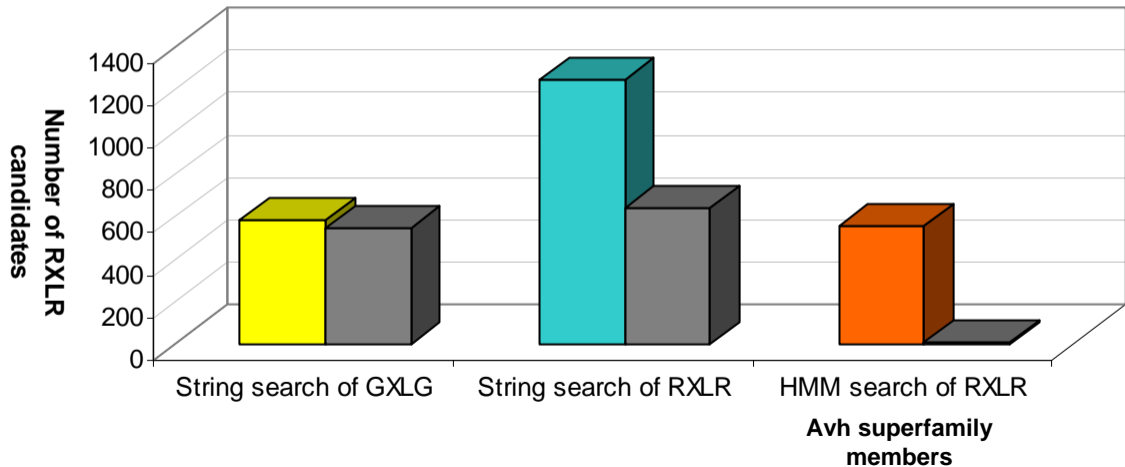

Supplement: pnas_0709303105_3.pdf [file pnas_0709303105_3.pdf]
