# Supplementary material
Source: PubMed Central journal article supplement (PMC2290801)
Supplement: pnas_0709303105_6.pdf [file pnas_0709303105_6.pdf]

A

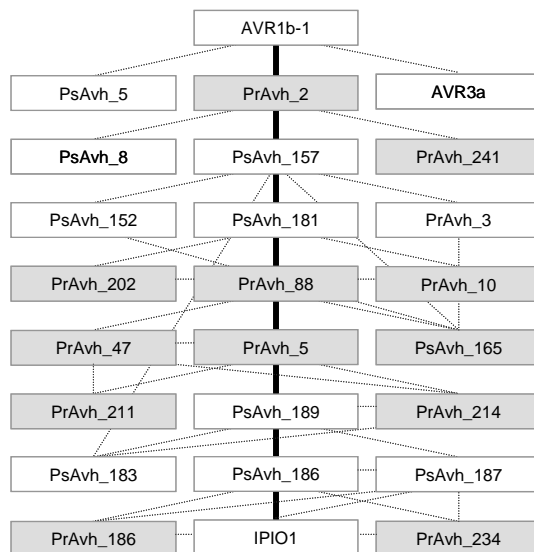

B

|           |    |                                                                                                                           |     |
|-----------|----|---------------------------------------------------------------------------------------------------------------------------|-----|
| AVR1b     | 1  | MRLSFVLSL-----VVAIGYVVTCAATEYSDEETNIAMVESPDVRRSLRNGDIACGRFLRAHEEDDA-GE-RTFSVTDLWNKVAACKLAKAMLADPSKEQKAYEKWAKKGYSLDKIKNWLA | 114 |
| PrAvh_2   | 1  | MRLSFALLLAAVATLIASGDALSANAK--SDLTLTMTSSKKI--QSLAAGQSDGKRFLRSHKNIDFDGEERGVITN-----PIRRDMLSSSAYKKEVFDNWLHNKSSATIRDYLN       | 108 |
| PrAvh_2   | 1  | MRLSFALLLAAVATLIASGDALSANAKSDLTTLTMTSSKKIQSLAAGQSD--GKRFLRSHKNIDFDGEERGVITNPIR--RDMLSSSAYKKEVFDNWLHNKSSATIRDYLNLNKGR----  | 113 |
| PsAvh_157 | 1  | MRVQYAVLLIA--AVFLASVDAAS-----VATPRLDRSLAAQRDVTARFRFLR---IQEGGEEERGIATVVEKAKSLFTSSKISOKTTLERVWKNNKSPAKVLRQLQDDARLMLF       | 104 |
| PsAvh_157 | 1  | MRVQYAVLLIAAVFLASVDAAS-----VATPRLD--RSLAAQRDVTARFRFLR-----IQEGGEEERGIATVVEKAKSLFTSSKISOKTTLERVWKNNKSPAKV                  | 90  |
| PsAvh_181 | 1  | MRLADLALLVATLFIASCNALSSSEQQORI--VPPGADIPRSLAAASEDITVKSSRLRYGDALAADENDEERGLSSLKAKIGALFNKLYK-----YKYVWVRGKSEAEI             | 100 |
| PsAvh_181 | 9  | LVATLFIASCNALSSSEQQORI-----VPPGADIPRSLAAASEDITVKSSRLRYGDALAADENDEERGLSSLKAKIGALFNKLYKYVWVRGKSEAE--IYNIWVKQCKTDKQIYNLLAQ   | 120 |
| PrAvh_88  | 1  | MLMVIFHASVDAASAATNSKHIRTTKVAIPGVSALPSSFTADQKDIPSKKFLRGNADN-----DSNDEERAPIGALLGGAAQMMSSKRAKAEASSMSFEALVKKGVTPDDLFAKYGY     | 112 |
| PrAvh_88  | 3  | MVIFHASVDAASAATNSKHIRTTKVAIPGVSALPSSFTADQKDIPSKKFLRGNADN-----DSNDEERAPIGALLGGAAQMMSSKRAKAEASSMSFEALVKKGVTPDD              | 105 |
| PrAvh_5   | 12 | LVIIYSTTNAASAVTDSIEDTKLSQLTSEDLEAL--THLLAVESVDVAKRFLRGDTETDLTTAGSDTDALDAEAEERG-I--VPSSVTNLINKVKNWSKFKTKALEKAFKHMKNGEDPTK  | 126 |
| PrAvh_5   | 1  | MRLLLVWLLATLVIIYSTTNAASAVTDSIEDTKLSQLTSEDIEALTHLLAVESVD--AKRFLRGDTETDLTTAGSDTDALDAEAEERGIVPSSVTNLINKVKNWSKFKTKALEKAFKHM   | 119 |
| PsAvh_189 | 1  | MRLLLVWLLTLV+IS+ +A+ VTDS+D +SOLT +I+ L+ LL E+D D K FLRGD DLTTAG T E EERG+ +LI+ +KNGW+K+K+ ALEKAF+HMM                     | 110 |
| PsAvh_189 | 1  | MRLLLVWLLVTLVFISSASATATVTDKSDITVSQLTDSIEDLSRLTAETDDNTKPFRLRGAACKDLTTAGDKT-----EDEERGLF-----SLISSIKNGWAKWKSNALEKAFQHMM     | 96  |
| PsAvh_186 | 1  | MRLLLVWLLATVITILSSA-----DVASSKATPATINSDLVRELTAET--NTNGKRHLRGDEMRSSAMDFEDDDYDDEERGISDVVNRMKASLTGSVATRMKVTLGKMHSTANKK       | 109 |
| PsAvh_186 | 3  | LLLWVLLATVITILSSAVASSKATPATINSDLPVRELTAETNTNGKRHLRGDEMRSSAMDFEDDDYDDEER--GISDVVNRMKASLTGSVATRMKVTLGKMHSTANKKMKFMIERLFR    | 120 |
| IPIO1     | 4  | LLLTVLLNLVLLIATTAAGVSSNLNTAVNYASTSKIRFLSTFEYNADKRSRLRGDYN--EVTKEPNTSDEERAFSISKSAEYVKMVLVYG-----FKLGFSPRTQSKTVLRYE-DKLEF   | 112 |
