# Supplementary material
Source: PubMed Central journal article supplement (PMC2290801)
Supplement: pnas_0709303105_7.pdf [file pnas_0709303105_7.pdf]

AVR1b 1 MRLSEVLSVVAIGYVTCNATREYSDETNLAMESDLDVRRSLRNGDIAGGRFLRAHEDDDAGERTFSVTDLWVKVAAKK  
PsAvh\_5 1 MRLQFLVAVAT--LATSATRVPPDANLQSNAP--VQTVTRSR----RFLRTADTDIVYEPKVNHPGKKQVFIEDK

AVR1b 81 LAKAMADPSKEQKAEKNAKKGYSIDKKNWLAIAAPK--QKGYDRITYNGYTFHLYQS-----  
PsAvh\_5 72 LOKA--LTDPKKNKLYARWYNSGFTVQKQEGGLDQNNRELELTYKNLALGYAKYQARRSQEAK

PsAvh\_5 1 MRLQFFLVMA--VA---LATSATRVPPDANLQSNAP--VQTVTRSRFLR-TADTDIVYEPKVNHPCKKQVFIEDKL  
PsAvh\_24 1 MRLPSILVAASALALLASDASAAVAGASEGTKVSTMAFPDLDVAVSHSAKRSLHDIQVDEDEDERWAGAKLSAAKL

PsAvh\_5 73 QKALTDPPKKNKLYARWYNSGFTVQKQEGGLDQ--N-ENRELELTYKNLALGYAKY-----QARRSQEAK----  
PsAvh\_24 81 EKAVNDSKYAETLMRWKRHGFDIEDTKLSLEASKLSKDPRLNTVYRNYAAWLDKHFHSRVGLKPTTCSTRRSKTRWETA

PsAvh\_24 1 MRLPSILLAASALALLASDASALAAVAGASEGTKVSTMAFPDLDVAVSHSAKRSLHDIQVDEDEDERWAGAKLFS  
PsAvh\_29 1 MRLPSILVAASALAVLASDASALAAVAGASEDAKVMSTMAFPDLDVAVSHSATRFLRGLHESVGEVDEDERLAGDKLFH

PsAvh\_24 77 AAKLEKAMNDSKYAETLMRWKRHGFDIEDTKLSLEASKLSKDPRLNTVYRNYAAWLDKHFHSRV-GLKPT-----  
PsAvh\_29 81 AAKLEKAMNDSKYAETLMRWKRHGFDIEDTKLSLEASKLSKDPRLNTVYRNYAAWLDKHFHSRVGLKPTSGGDDLFNKAK

PsAvh\_24 146 -TCSTR---RRS---KTR--WE--LATTRRRCSSGSRPTITN-----RLVYRS---  
PsAvh\_29 161 LEVAIKDGNVYKRTLFKWKNTNHYESEAVFKQLNALGRKDFDNTLDRLYVDYVIWLVNHVPHPDTLKLANEPLLFKESMLL

PsAvh\_29 1 MRLPSILVAASALAVLASDASALAAVAGASEDAKVMSTMAFPDLDVAVSHSATRFLRGLHESVGEVDEDERLAGDKLFH  
PsAvh\_32 1 MRLFMNMLVAVLAVLASGTAVSADQASVNLVVDVHSS--R---VLSGEDKRFRLRSHQITCDEGK-----

PsAvh\_29 81 AAKLEKAMNDSKYAETLMRWKRHGFDIEDTKLSLEASKLSKDPRLNTVYRNYAAWLDKHFHSRVGLKPTSGGDDLFNKAK  
PsAvh\_32 62 -----ITKHDEE-----RVS-----GENLFGALK

PsAvh\_29 161 LEVAIKDGNVYKRTLFKWKNTNHYESEAVFKQLNALGRKDFDNTLDRLYVDYVIWLVNHVPHPDTLKLANEPLLFKESMLL  
PsAvh\_32 82 VLKMGDWNVYRDKVFORWKNYGHGHTKKSYLEKG-----

PsAvh\_29 241 KARTDVDYAQSLFWANKNFSLEKVTENLKLTFANADNKVLRGYTNWLIINNFH  
PsAvh\_32 114 -----VPDSLVGAYKSYLKLKNTG-----KVFGDHRPHHIEPR

PsAvh\_32 1 MRLFMNMLVAVLAVLASGTAVSADQASVNLVVDVHSSRVLSFEDKRFRLRSHQITCDEGKIKTHDDEERVSGENLFGALK  
PsAvh\_275 1 MRLTNTLVVAVAAILLASENFAATDA----DQATVSKLAAEFDTLVDLVTESKRSRATVDD----GEERKQF

PsAvh\_32 81 KVLKMGDWNVYRDKVFORWKNYGHGHTKKSYLEKGVDPDSLVGAYKSYLKLKNTGKVFGDHPRHIEPR  
PsAvh\_275 71 KLEALKKGG--WTDLFNKWKGNELSPAEOVKLNKKNKLSDDLK-----DALFRNYKDW-----

PsAvh\_275 1 MRLTNTLVVAVAAILLASENFAATDAQATVSKLAAEFDTLVDLVTES-----KRSRATVDD--DGEER  
PsAvh\_189 1 MRLLLVLLVTLVTFISSASATATVTDKIDTVSQTLDSEIDELSRLLTAETDDDNKPFRLGDAKDLTTAGDKTDEE

PsAvh\_275 66 RYKQFKLEALKKG--KWD-----IFNKWKGNELSPAEOVKLNK-----KKSDDLKDAFRNYKDW-----  
PsAvh\_189 81 RGLFSLISSIKNGAKWKSNALEKAFQHMKGHGETPTLAKFLRIGGATEPRYERLYEKLVQDPEPHRYLSSGCDY

PsAvh\_189 1 MRLLLVLLVTLVTFISSASATATVTDKIDTVSQTLDSEIDELSRLLTAETDDDNKPFRLGDAKDLTTAG--DKTDE  
PsAvh\_186 1 MRLLLVLLVTLVTFISSADVASKATPATINS-----DLPVRELTAEATN-TNGKRHLRGDEMSAMDFEDDDYDD

PsAvh\_189 79 EERGLFSLISSIKN---GWA--KWKNSA-----LEKAFQHMKGHGETP--T---TLAKRLEIGGATEPRY  
PsAvh\_186 72 EERGISDVMNRMKASLTGVSATRMKVTLGKMHSTANKMKQKFMERLFRWVYKRGETPLSVRTKTMQKQNYWSARTBRGT

PsAvh\_186 1 MR-LLLVLLVTLVTFISSADVASKATPATINSDLPVRELTAEATN-TNGKRHLRGDEMSAMDFEDDDYDDEERGISDV  
IPI01 1 MRSLLLTVLLNLVLLAATGAVSSNLNTAVNYASTKLRFLSTBYNADEKRSRGRG--DYNNEVTKPEPNTSDEERAFSSKSKS

PsAvh\_186 80 VNRMKASLTGVSATRMKVTLGKMHSTANKMKQKFMERLFRWVYKRGETPLSVRTKTMQKQNYWSARTEGRTREWQCLG  
IPI01 80 AEYVKMVLG-----FKLGFSPRTQSKTVLRY-EDKLFALYKSGETPRSLRTELD-----K-----

PsAvh\_186 160 STSNADSTAACAEEAKMKHKEVSR-  
IPI01 132 -----ASASVFNFRFKWYDKNVGFS
