# Supplementary material
Source: PubMed Central journal article supplement (PMC2290801)
Supplement: pnas_0709303105_8.pdf [file pnas_0709303105_8.pdf]

A Pair-wise transition of Avh family

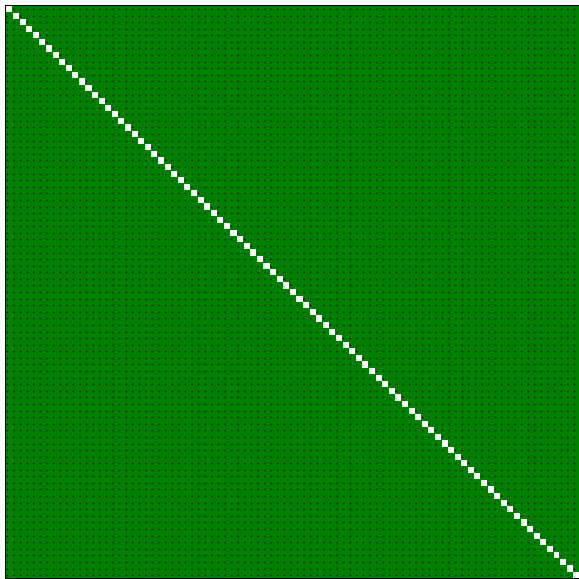

B Pair-wise transition of permuted Avh family

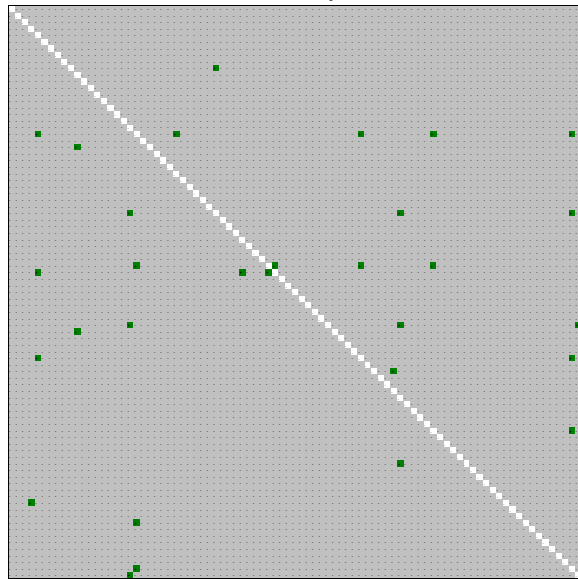

C Pair-wise transition of randomly selected *P.sojae* proteins

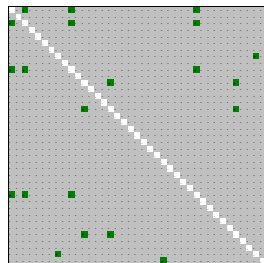

- Connected by transition pairs
- Transition pairs absent
