# Supplementary material
Source: PubMed Central journal article supplement (PMC2290801)
Supplement: pnas_0709303105_9.pdf [file pnas_0709303105_9.pdf]

## W-motif

## Y-motif

## L-motif

|           |     |                           |                          |     |                        |                        |      |                                |                                |
|-----------|-----|---------------------------|--------------------------|-----|------------------------|------------------------|------|--------------------------------|--------------------------------|
| PsAvh_459 | 73  | 97                        | KLTKWLNKGSVDEVFVRMGLKKA  | 99  | 120                    | AKLFQTPQLFSWARYVDDLKGL | *135 | 166                            | QYGDEALARMIAAAKENADVKKLASKLELE |
|           | 167 | 191                       | QLYAWATKGTKPDEAFALFKLSKG | 192 | 213                    | DDFLSTPQFTTLTKYLKVFNS  | 228  | 258                            | SYGDDKVAKILQAAMKVPETAPTAKLDTE  |
|           | 258 | 282                       | LVQLWLANRESTDVFTLLKLDKG  | 283 | 304                    | DTLFSNPLLVTWTKYMNAFNQ  |      |                                |                                |
|           |     |                           |                          | 347 | 368                    | ENLFENPHFVTWLQFVEDPRR  | 381  | 411                            | KYGDEALIKMIDAAKTVAKTKDMATKLQIQ |
|           | 411 | 435                       | QFQYWASIGKSPDDVFKLYELNKG | 436 | 457                    | DKLLSNPELTTWKSYLENVFNK | 472  | 502                            | TFGDDVVVMLEAAKKVRGTSRDAKRLESV  |
|           | 502 | 524                       | QLQRW--MKMEPDDVFTALKLDKA | 525 | 546                    | ENMFDSLQLNAGKYAAAFNE   | 561  | 591                            | HYSKGVVGLLAAAKKAPGSEAIATRLQSE  |
|           | 591 | 615                       | QLQYWLSIKKSPTDVFKAFKLDKD | 616 | 637                    | DKLLVSPYFSTWIKYTDDLK   | 651  | 681                            | YSEDALVKMILAAEKNPSTOKIAQWTEBK  |
| 681       | 704 | LFRGWMLTG-SPSDFRGLKLDKDEG | 705                      | 726 | EKVFAPLFAFYTKFMARVTE   | 741                    | 771  | GMGDEALAATLIAAKKVPSTEKIATTMQAE |                                |
| * 771     | 796 | QIKYWLNKMTPEKLFKDVLFQLDV  | 797                      | 818 | DTVLTNPVLNTWATYLAQAFNA | 818                    | 847  | NKPVKEQASMIQVLRNSFGDKMATDLETAL |                                |

|           |     |     |                           |     |     |                        |      |     |                                |
|-----------|-----|-----|---------------------------|-----|-----|------------------------|------|-----|--------------------------------|
| PrAvh_222 | 143 | 167 | KLDDLLQKGTSTDGVFKLLALDNA  | 168 | 189 | DDILGSPQLNAWISYMKRFNS  | 204  | 234 | HYGDEALAKMIEAAKKVPTTAGFAKRVQTE |
|           | 234 | 258 | LVQRWLVAGETPKV FALLKLDEG  | 259 | 280 | AGLFAQPQVVTWAKYMDDFNM  | *295 | 327 | RYKDETLVQMLIAAEKVPSTKGIATRVOAE |
|           | 327 | 351 | QTKLWLTEGKEPLDVFKLLGLDEG  | 352 | 373 | LTLNLSPLFSAWVKYTDDFRK  | *388 | 420 | YYDDYNLAKVLVDGMASPTASLATRLETE  |
|           | 420 | 444 | LLREWYMAVKPPMYVFKMLNLQTG  | 445 | 466 | LKLFANPLYTIWNTNYIAFFNK | 481  | 511 | ELGEKKLSRVLIAAEKVPSTKDIATKLQKE |
|           | 511 | 535 | QLKLWLA AERNPLDVYELLRVEKA |     |     |                        |      |     |                                |

|          |     |     |                           |
|----------|-----|-----|---------------------------|
| PrAvh_53 | 94  | 118 | LFRRWKRNGFEGNDAFDKLLKAYNG |
|          | 168 | 192 | LFGRWKHNRLSDAVFARFQQMGK   |
|          | 245 | 269 | LFAKWKTSGLSDSLVFTREFALGK  |
