# Supplementary material
Source: PubMed Central journal article supplement (PMC2290801)
Supplement: pnas_0709303105_11.pdf [file pnas_0709303105_11.pdf]

*P. sojae* scaffold 37 125755:256031 bp

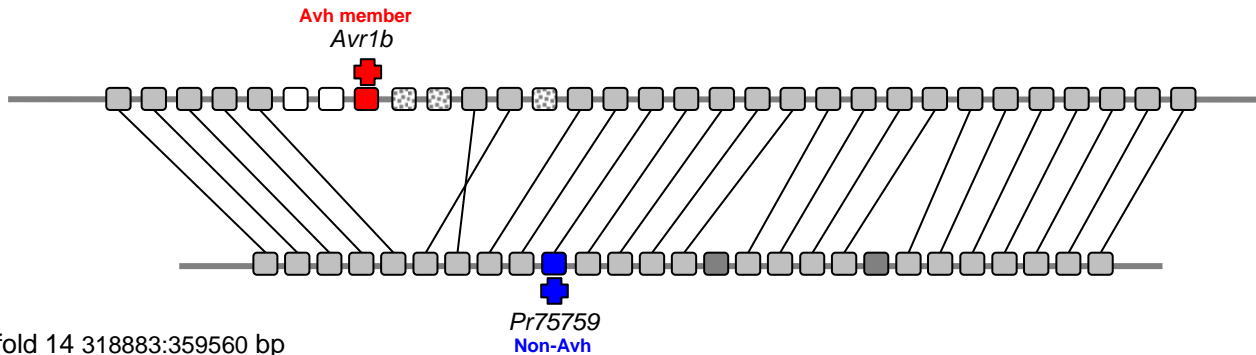

*P. ramorum* scaffold 14 318883:359560 bp

■ Gene with an ortholog

■ Homologous gene located elsewhere

⊕ Predicted RXLR gene

■ Duplicated gene

□ Gene absent in the other genome
