# Supplementary material
Source: PubMed Central journal article supplement (PMC2290801)
Supplement: pnas_0709303105_12.pdf [file pnas_0709303105_12.pdf]

**Table 3. Similarity groups of Avh proteins**

| Cluster ID | Number of proteins | Name of the proteins |
|------------|--------------------|----------------------|
| AG_172     | 1                  | PsAvh_80             |
| AG_171     | 1                  | PsAvh_87             |
| AG_170     | 1                  | PsAvh_90             |
| AG_169     | 1                  | PsAvh_96             |
| AG_168     | 1                  | PrRF_1               |
| AG_167     | 1                  | PrAvh_266            |
| AG_166     | 1                  | PrAvh_272            |
| AG_165     | 1                  | PrAvh_324            |
| AG_164     | 1                  | PrAvh_102            |
| AG_163     | 1                  | PrAvh_124            |
| AG_162     | 1                  | PrAvh_153            |
| AG_161     | 1                  | PrAvh_37             |
| AG_160     | 1                  | PrAvh_88             |
| AG_159     | 1                  | PsRF_25              |
| AG_158     | 1                  | PsRF_4               |
| AG_157     | 1                  | PsRF_49              |
| AG_156     | 1                  | PsAvh_111            |
| AG_155     | 1                  | PsAvh_113            |

|        |   |           |
|--------|---|-----------|
| AG_154 | 1 | PsAvh_115 |
| AG_153 | 1 | PsAvh_457 |
| AG_152 | 1 | PsAvh_171 |
| AG_151 | 1 | PsAvh_201 |
| AG_150 | 1 | PsAvh_210 |
| AG_149 | 1 | PsAvh_213 |
| AG_148 | 1 | PsAvh_214 |
| AG_147 | 1 | PsAvh_216 |
| AG_146 | 1 | PsAvh_218 |
| AG_145 | 1 | PsAvh_222 |
| AG_144 | 1 | PsAvh_225 |
| AG_143 | 1 | PsAvh_238 |
| AG_142 | 1 | PsAvh_239 |
| AG_141 | 1 | PsAvh_243 |
| AG_140 | 1 | PsAvh_257 |
| AG_139 | 1 | PsAvh_262 |
| AG_138 | 1 | PsAvh_263 |
| AG_137 | 1 | PsAvh_268 |
| AG_136 | 1 | PsAvh_28  |
| AG_135 | 1 | PsAvh_298 |
| AG_134 | 1 | PsAvh_302 |
| AG_133 | 1 | PsAvh_304 |
| AG_132 | 1 | PsAvh_311 |

|        |   |           |
|--------|---|-----------|
| AG_131 | 1 | PsAvh_312 |
| AG_130 | 1 | PsAvh_322 |
| AG_129 | 1 | PsAvh_323 |
| AG_128 | 1 | PsAvh_325 |
| AG_127 | 1 | PsAvh_336 |
| AG_126 | 1 | PsAvh_337 |
| AG_125 | 1 | PsAvh_338 |
| AG_124 | 1 | PsAvh_359 |
| AG_123 | 1 | PsAvh_369 |
| AG_122 | 1 | PsAvh_377 |
| AG_121 | 1 | PsAvh_41  |
| AG_120 | 1 | PsAvh_48  |
| AG_119 | 1 | PsAvh_49  |
| AG_118 | 1 | PsAvh_67  |
| AG_117 | 1 | PsAvh_72  |
| AG_116 | 1 | PsAvh_79  |
| AG_115 | 1 | PsAvh_73  |
| AG_114 | 1 | PsRF_24   |
| AG_113 | 1 | PsRF_3    |
| AG_112 | 1 | PsAvh_25  |
| AG_111 | 1 | PsAvh_26  |
| AG_110 | 1 | PsAvh_283 |
| AG_109 | 1 | PsAvh_346 |

|        |   |                     |
|--------|---|---------------------|
| AG_108 | 1 | PsAvh_282           |
| AG_107 | 1 | PsAvh_244           |
| AG_106 | 1 | PsAvh_140           |
| AG_105 | 2 | PsAvh_105 PrAvh_20  |
| AG_104 | 2 | PsAvh_131 PsAvh_176 |
| AG_103 | 2 | PsAvh_220 PsAvh_221 |
| AG_102 | 2 | PsAvh_223 PsAvh_224 |
| AG_101 | 2 | PsAvh_260 PrAvh_55  |
| AG_100 | 2 | PsAvh_275 PsAvh_34  |
| AG_99  | 2 | PsAvh_114 PsAvh_280 |
| AG_98  | 2 | PsAvh_18 PsAvh_281  |
| AG_97  | 2 | PsAvh_355 PsAvh_358 |
| AG_96  | 2 | PsAvh_270 PsAvh_364 |
| AG_95  | 2 | PsAvh_38 PrAvh_215  |
| AG_94  | 2 | PrAvh_243 PrAvh_245 |
| AG_93  | 2 | PrAvh_264 PrAvh_122 |
| AG_92  | 2 | PsAvh_190 PrAvh_296 |
| AG_91  | 2 | PrAvh_310 PrAvh_311 |
| AG_90  | 2 | PrAvh_103 PsRF_51   |
| AG_89  | 2 | PsAvh_219 PrAvh_145 |
| AG_88  | 2 | PrAvh_323 PrAvh_156 |
| AG_87  | 2 | PsAvh_182 PrAvh_63  |
| AG_86  | 2 | PrAvh_166 PrAvh_70  |

|       |   |                                      |
|-------|---|--------------------------------------|
| AG_85 | 2 | PsAvh_137 PrAvh_72                   |
| AG_84 | 2 | PsAvh_27 PsRF_47                     |
| AG_83 | 2 | PsAvh_110 PsAvh_191                  |
| AG_82 | 2 | PrAvh_82 PrAvh_83                    |
| AG_81 | 2 | PsAvh_291 PsAvh_292                  |
| AG_80 | 2 | PsAvh_39 PsAvh_40                    |
| AG_79 | 2 | PsAvh_266 PsAvh_267                  |
| AG_78 | 3 | PsAvh_102 PrAvh_289 PrAvh_23         |
| AG_77 | 3 | PsAvh_15 PsAvh_19 PsAvh_316          |
| AG_76 | 3 | PsAvh_256 PrAvh_115 PrAvh_75         |
| AG_75 | 3 | PsAvh_259 PsAvh_265 PrAvh_160        |
| AG_74 | 3 | PsAvh_350 PsAvh_352 PrAvh_81         |
| AG_73 | 3 | PsAvh_124 PsAvh_206 PsAvh_363        |
| AG_72 | 3 | PsAvh_181 PrAvh_202 PrAvh_10         |
| AG_71 | 3 | PsAvh_179 PsAvh_317 PrAvh_104        |
| AG_70 | 3 | PsAvh_184 PrAvh_43 PsRF_6            |
| AG_69 | 3 | PsAvh_138 PsAvh_310 PsRF_31          |
| AG_68 | 3 | PrAvh_7 PsRF_33 PsRF_34              |
| AG_67 | 3 | PsAvh_242 PsAvh_247 PsRF_43          |
| AG_66 | 3 | PsAvh_109 PrAvh_347 PrAvh_348        |
| AG_65 | 3 | PrAvh_59 PsAvh_148 PsAvh_150         |
| AG_64 | 3 | PrAvh_170 PsRF_54 PsAvh_272          |
| AG_63 | 4 | PsAvh_170 PsAvh_172 PsAvh_306 PsRF_5 |

|       |   |                                                   |
|-------|---|---------------------------------------------------|
| AG_62 | 4 | PsAvh_192 PsAvh_193 PsAvh_297 PsAvh_342           |
| AG_61 | 4 | PsAvh_258 PsAvh_288 PsAvh_294 PrAvh_336           |
| AG_60 | 4 | PsAvh_126 PsAvh_372 PsAvh_373 PsRF_50             |
| AG_59 | 4 | PsAvh_122 PsAvh_127 PrAvh_180 PrAvh_221           |
| AG_58 | 4 | PsAvh_264 PrAvh_326 PrAvh_48 PsRF_12              |
| AG_57 | 4 | PsAvh_30 PsAvh_31 PsAvh_77 PrAvh_30               |
| AG_56 | 4 | PsAvh_240 PsAvh_241 PrAvh_56 PrAvh_61             |
| AG_55 | 4 | PsAvh_117 PsAvh_118 PsAvh_119 PsRF_10             |
| AG_54 | 4 | PsRF_23 PsRF_29 PsRF_30 PsRF_42                   |
| AG_53 | 4 | PsAvh_1 PsAvh_4 Avr3a Avr1b                       |
| AG_52 | 4 | PsAvh_5 PsAvh_75 PrAvh_130 PrAvh_141              |
| AG_51 | 4 | PrAvh_315 PrAvh_316 PrAvh_35 PsAvh_271            |
| AG_50 | 4 | PrAvh_182 PsAvh_32 PsAvh_6 PsAvh_64               |
| AG_49 | 5 | PsAvh_13 PsAvh_198 PsAvh_20 PsAvh_362 PrAvh_283   |
| AG_48 | 5 | PsAvh_151 PsAvh_199 PrAvh_257 PrAvh_258 PrAvh_259 |
| AG_47 | 5 | PsAvh_128 PsAvh_177 PsAvh_178 PsAvh_209 PsAvh_343 |
| AG_46 | 5 | PrAvh_250 PrAvh_109 PrAvh_110 PrAvh_111 PrAvh_112 |
| AG_45 | 5 | PsAvh_269 PsAvh_340 PrAvh_21 PrAvh_58 PsRF_32     |
| AG_44 | 5 | PrAvh_1 PrAvh_2 PrAvh_241 PrAvh_242 PsAvh_8       |
| AG_43 | 5 | PrAvh_188 PrAvh_91 PrAvh_92 PsAvh_139 PsAvh_143   |
| AG_42 | 5 | PrAvh_213 PrAvh_218 PrAvh_220 PrAvh_279 PrAvh_62  |
| AG_41 | 5 | PrAvh_137 PrAvh_144 PrAvh_161 PrAvh_207 PrAvh_339 |
| AG_40 | 5 | PrAvh_11 PrAvh_299 PsAvh_230 PrAvh_290 PsAvh_366  |

|       |   |                                                                               |
|-------|---|-------------------------------------------------------------------------------|
| AG_39 | 6 | PsAvh_156 PsAvh_166 PsAvh_344 PrAvh_33 PrAvh_34                               |
| AG_38 | 6 | PsAvh_17 PsAvh_94 PsAvh_95 PrAvh_280 PrAvh_66 PsRF_35                         |
| AG_37 | 6 | PsAvh_153 PsAvh_163 PsAvh_168 PsAvh_204 PsAvh_284 PsRF_37                     |
| AG_36 | 6 | PsAvh_205 PsAvh_229 PsAvh_309 PsAvh_50 PsAvh_9 PsAvh_97                       |
| AG_35 | 6 | PsAvh_246 PsAvh_254 PsAvh_383 PrAvh_193 PrAvh_194 PsRF_57                     |
| AG_34 | 6 | PsAvh_307 PsAvh_332 PrAvh_268 PrAvh_281 PrAvh_165 PrAvh_67                    |
| AG_33 | 6 | PsRF_15 PsRF_9 PsAvh_200 PsAvh_235 PsAvh_236 PsAvh_237                        |
| AG_32 | 6 | PsRF_16 PsRF_48 PsAvh_36 PsAvh_370 PsAvh_71 PsAvh_92                          |
| AG_31 | 6 | PrAvh_302 PrAvh_304 PrAvh_306 PrAvh_307 PrAvh_303 PrAvh_212                   |
| AG_30 | 6 | PrAvh_123 PrAvh_236 PrAvh_176 PsRF_27 PsAvh_194 PsAvh_290                     |
| AG_29 | 7 | PsAvh_195 PsAvh_196 PsAvh_197 PsAvh_375 PsAvh_376 PrAvh_19 PsRF_53            |
| AG_28 | 7 | PsAvh_208 PsAvh_289 PsAvh_51 PsAvh_84 PsAvh_85 PrAvh_150 PrAvh_31             |
| AG_27 | 7 | PsAvh_189 PsAvh_42 PrAvh_211 PrAvh_214 PrAvh_47 PrAvh_5 PrAvh_77              |
| AG_26 | 7 | PrAvh_240 PrAvh_262 PrAvh_265 PrAvh_270 PrAvh_271 PrAvh_286 PrAvh_32          |
| AG_25 | 7 | PrAvh_206 PrAvh_274 PrAvh_275 PrAvh_332 PrAvh_333 PrAvh_334 PrAvh_335         |
| AG_24 | 7 | PsRF_18 PsAvh_141 PsAvh_152 PsAvh_157 PsAvh_313 PsAvh_314 PsAvh_315           |
| AG_23 | 7 | PrAvh_159 PrAvh_171 PrAvh_209 PrAvh_216 PrAvh_267 PrAvh_325 PsAvh_296         |
| AG_22 | 7 | PrAvh_164 PrAvh_45 PrAvh_53 PrAvh_71 PsAvh_101 PsAvh_24 PsAvh_29              |
| AG_21 | 7 | PrRF_16 PrAvh_118 PrAvh_22 PrAvh_298 PrAvh_337 PrAvh_42 PsRF_2                |
| AG_20 | 7 | PsRF_13 PsAvh_217 PsAvh_277 PsAvh_293 PsAvh_299 PsAvh_300 PsAvh_301           |
| AG_19 | 8 | PsAvh_123 PsAvh_125 PsAvh_228 PsAvh_279 PsAvh_371 PrAvh_291 PrAvh_328         |
| AG_18 | 8 | PsAvh_132 PsAvh_59 PsAvh_66 PsAvh_68 PrAvh_46 PrAvh_52 PrAvh_95 PsRF_21       |
| AG_17 | 8 | PrRF_10 PrAvh_278 PrAvh_300 PrAvh_301 PrAvh_305 PrAvh_308 PrAvh_309 PrAvh_113 |

|       |    |                                                                                                                                                                                                                                            |
|-------|----|--------------------------------------------------------------------------------------------------------------------------------------------------------------------------------------------------------------------------------------------|
| AG_16 | 9  | PsRF_19 PsAvh_231 PsAvh_232 PsAvh_274 PsAvh_278 PsAvh_285 PsAvh_308 PsAvh_318 PsAvh_334                                                                                                                                                    |
| AG_15 | 10 | PrAvh_201 PrAvh_237 PrAvh_238 PrAvh_256 PrAvh_312 PrAvh_313 PrAvh_119 PrAvh_14 PrAvh_29 PrAvh_51                                                                                                                                           |
| AG_14 | 10 | PrAvh_125 PrAvh_69 PrAvh_16 PrAvh_27 PsAvh_245 PrAvh_50 PrAvh_217 PrAvh_64 PrAvh_149 PrAvh_219                                                                                                                                             |
| AG_13 | 12 | PsAvh_248 PsAvh_249 PsAvh_250 PsAvh_251 PsAvh_252 PsAvh_253 PsAvh_255 PsAvh_367 PsAvh_374 PrAvh_200 PrAvh_157 PsRF_52                                                                                                                      |
| AG_12 | 12 | PsAvh_226 PsAvh_261 PrAvh_205 PrAvh_295 PrAvh_108 PrAvh_120 PrAvh_121 PrAvh_151 PrAvh_36 PrAvh_38 PrAvh_60 PrAvh_68                                                                                                                        |
| AG_11 | 12 | PrAvh_169 PrAvh_192 PrAvh_246 PrAvh_244 PrAvh_247 PrAvh_17 PrAvh_263 PsRF_22 PsAvh_98 PsAvh_99 PsAvh_276 PsAvh_320                                                                                                                         |
| AG_10 | 13 | PsAvh_211 PsAvh_341 PsAvh_63 PsAvh_81 PrRF_4 PrAvh_261 PrAvh_269 PrAvh_330 PrAvh_331 PrAvh_54 PrAvh_74 PrAvh_76 PsRF_1                                                                                                                     |
| AG_9  | 13 | PsAvh_183 PsAvh_305 PsAvh_86 PrRF_13 PrAvh_178 PrAvh_179 PrAvh_189 PrAvh_190 PrAvh_191 PrAvh_195 PrAvh_235 PrAvh_342<br>PsRF_17                                                                                                            |
| AG_8  | 13 | PsAvh_227 PsAvh_233 PsAvh_45 PsAvh_65 PrAvh_197 PrAvh_199 PrAvh_204 PrAvh_273 PrAvh_285 PrAvh_322 PrAvh_343 PrAvh_344<br>PrAvh_44                                                                                                          |
| AG_7  | 13 | PrAvh_177 PsRF_39 PrAvh_276 PrAvh_277 PsRF_40 PsAvh_326 PsAvh_61 PsAvh_347 PsAvh_348 PsAvh_349 PsAvh_365 PsAvh_330<br>PsAvh_331                                                                                                            |
| AG_6  | 14 | PsAvh_327 PsAvh_328 PrRF_6 PrAvh_98 PrAvh_107 PrAvh_106 PrAvh_57 PrAvh_100 PrAvh_99 PrAvh_228 PrAvh_340<br>PrAvh_341 PsAvh_329                                                                                                             |
| AG_5  | 19 | PsAvh_185 PsAvh_186 PsAvh_187 PsAvh_188 PsAvh_361 infIpiO1 infIpiO2 PrAvh_185 PrAvh_186 PrAvh_203 PrAvh_227 PrAvh_230<br>PrAvh_231 PrAvh_232 PrAvh_233 PrAvh_234 PrAvh_249 PrAvh_288 PrAvh_147                                             |
| AG_4  | 23 | PsAvh_108 PsAvh_180 PsAvh_35 PsAvh_368 PsAvh_43 PsAvh_62 PsAvh_78 PrRF_14 PrRF_3 PrRF_8 PrAvh_183 PrAvh_208 PrAvh_239<br>PrAvh_327 PrAvh_345 PrAvh_12 PrAvh_13 PrAvh_15 PrAvh_18 PrAvh_25 PrAvh_6 PrAvh_84 PrAvh_9                         |
| AG_3  | 24 | PsAvh_14 PsAvh_16 PsAvh_207 PsAvh_21 PsAvh_212 PsAvh_22 PsAvh_23 PsAvh_319 PsAvh_321 PsAvh_46 PsAvh_52 PsAvh_53<br>PsAvh_7a PsAvh_7b1 PsAvh_7b2 PsAvh_7c PsAvh_88 PsAvh_91 PrAvh_172 PrAvh_173 PrAvh_174 PrAvh_184 PrAvh_49 PsRF_20        |
| AG_2  | 42 | PrAvh_248 PrAvh_90 PrAvh_229 PrAvh_89 PrAvh_93 PrAvh_73 PrAvh_97 PrAvh_78 PrAvh_79 PrAvh_96 PrAvh_198 PsAvh_295<br>PsAvh_378 PsAvh_379 PsAvh_202 PsAvh_273 PsAvh_155 PsAvh_380 PsAvh_158 PsAvh_360 PsAvh_160 PsAvh_164 PsAvh_351 PsAvh_215 |



|         |    |                                                                                                                                                                                                         |
|---------|----|---------------------------------------------------------------------------------------------------------------------------------------------------------------------------------------------------------|
|         |    | PsAvh_354 PsAvh_356 PsAvh_345 PsRF_41 PsAvh_353 PsAvh_161 PsAvh_203 PsRF_26 PrRF_5 PrAvh_41 PrRF_9 PrAvh_225 PrAvh_175<br>PrAvh_158 PrAvh_80 PrAvh_224 PrAvh_39 PsRF_38                                 |
| AG_1_20 | 1  | PrAvh_253                                                                                                                                                                                               |
| AG_1_19 | 1  | PsRF_28                                                                                                                                                                                                 |
| AG_1_18 | 1  | PsRF_45                                                                                                                                                                                                 |
| AG_1_17 | 1  | PsAvh_107                                                                                                                                                                                               |
| AG_1_16 | 1  | PsAvh_167                                                                                                                                                                                               |
| AG_1_15 | 1  | PsAvh_169                                                                                                                                                                                               |
| AG_1_14 | 1  | PsAvh_303                                                                                                                                                                                               |
| AG_1_13 | 1  | PsAvh_324                                                                                                                                                                                               |
| AG_1_12 | 1  | PsAvh_37                                                                                                                                                                                                |
| AG_1_11 | 2  | PrAvh_116 PrAvh_117                                                                                                                                                                                     |
| AG_1_10 | 2  | PrAvh_162 PrAvh_163                                                                                                                                                                                     |
| AG_1_9  | 3  | PrAvh_152 PrAvh_154 PrAvh_155                                                                                                                                                                           |
| AG_1_8  | 4  | PrAvh_28 PsAvh_144 PsAvh_145 PsAvh_149                                                                                                                                                                  |
| AG_1_7  | 5  | PrAvh_210 PrAvh_255 PrAvh_318 PsRF_46 PsAvh_162                                                                                                                                                         |
| AG_1_6  | 5  | PrAvh_181 PrAvh_26 PrAvh_287 PrAvh_319 PsAvh_147                                                                                                                                                        |
| AG_1_5  | 5  | PrAvh_101 PrAvh_222 PrAvh_223 PrAvh_338 PrAvh_94                                                                                                                                                        |
| AG_1_4  | 9  | PrAvh_148 PrAvh_187 PrAvh_65 PrAvh_86 PsRF_14 PsRF_7 PsRF_8 PsAvh_173 PsAvh_174                                                                                                                         |
| AG_1_3  | 12 | PrRF_15 PrAvh_114 PrAvh_226 PrAvh_3 PrAvh_4 PrAvh_8 PsAvh_146 PsAvh_154 PsAvh_459 PsAvh_159 PsAvh_286 PsAvh_287                                                                                         |
| AG_1_2  | 21 | PrRF_17 PrRF_2 PrRF_7 PrAvh_105 PrAvh_131 PrAvh_132 PrAvh_138 PrAvh_139 PrAvh_24 PrAvh_251 PrAvh_282 PrAvh_293 PrAvh_294<br>PrAvh_314 PrAvh_317 PrAvh_320 PrAvh_321 PsRF_11 PsRF_44 PsAvh_165 PsAvh_234 |
| AG_1_1  | 32 | PrRF_11 PrAvh_126 PrAvh_127 PrAvh_128 PrAvh_129 PrAvh_133 PrAvh_134 PrAvh_135 PrAvh_136 PrAvh_140 PrAvh_142 PrAvh_143                                                                                   |

|  |  |                                                                                                                                                                                                        |
|--|--|--------------------------------------------------------------------------------------------------------------------------------------------------------------------------------------------------------|
|  |  | PrAvh_146 PrAvh_167 PrAvh_168 PrAvh_196 PrAvh_252 PrAvh_254 PrAvh_260 PrAvh_284 PrAvh_292 PrAvh_297 PrAvh_329 PrAvh_346<br>PsRF_55 PsRF_56 PsAvh_456 PsAvh_458 PsAvh_175 PsAvh_333 PsAvh_339 PsAvh_381 |
|--|--|--------------------------------------------------------------------------------------------------------------------------------------------------------------------------------------------------------|
