# Supplementary material
Source: PubMed Central journal article supplement (PMC2290801)
Supplement: pnas_0709303105_13.pdf [file pnas_0709303105_13.pdf]

**Table 4. Avh proteins illustrating a similarity transition from ipiO1 to Avr1b**

| Avh       | Pairwise sequence identity* | Group ID <sup>†</sup> | Protein size (aa) | Homolog identity <sup>‡</sup> | Located at syntenic position | Avh domain                        | Motifs present in the C termini <sup>§</sup> | W-motif sequences                                                                                                                          |
|-----------|-----------------------------|-----------------------|-------------------|-------------------------------|------------------------------|-----------------------------------|----------------------------------------------|--------------------------------------------------------------------------------------------------------------------------------------------|
| ipiO1     | .                           | AG_5 (19)             | 152               | 36                            |                              | RSLRGDYNNEVTKEPNTSDEER            | W (1)                                        | LFTALYKSGETPRSLR TKHL                                                                                                                      |
| PsAvr_186 | 36%                         | AG_5 (19)             | 184               | 36                            |                              | RHLRGDEMRSAMDFEDDDDDY<br>DDEER    | W (1)                                        | LFRWVYKRGETPLSVRTKTMGQKN                                                                                                                   |
| PsAvh_189 | 32%                         | AG_27 (7)             | 157               | 60                            | Yes                          | PFLRGDAKKDLTTAGDKTEDE<br>ER       | W (1)                                        | AFQHMMKHGETPTTLAKRLEIGGA                                                                                                                   |
| PrAvh_5   | 60%                         | AG_27 (7)             | 323               | 27                            | Yes                          | RFLRGDTETDLTTAGSDTDALD<br>AEAEEER | W (1)                                        | AFKHMKNKNGEDPTKLAKRLEIGGA                                                                                                                  |
| PrAvh_88  | 25%                         | AG_160 (1)            | 176               | 0                             |                              | KFLRGNDNADDSNDEER                 | W (3)                                        | SFEALVKKGVTPDDDLFAKYGYNEN<br>GFELVKKKGVTPDDDLFAKYGYEHH<br>GFESWLKKGVTPDDDLLEKYSYHY                                                         |
| PsAvh_181 | 25%                         | AG_72 (3)             | 274               | 32                            |                              | SSLRYGDLAADENDEER                 | W (5)                                        | IYNIWVKQKTKDKQIYNLLAQQGN<br>MFRRF---GKSDDEIYKIWKKEQRR<br>INRIWLRVVGKTDEDIYKLLKPKMS<br>LYNLWLQKQKSEKIYNIWLKENV<br>IYAAWFSSTRTPDSVLDLQLQNVYK |
| PsAvh_157 | 35%                         | AG_24 (7)             | 165               | 38                            |                              | RFLRIQEGGEER                      | W (1) Y(1) L(1)                              | TLERWVKNKNSPAKVLTRLQLDDA                                                                                                                   |
| PrAvh_2   | 30%                         | AG_44 (4)             | 178               | 28                            |                              | RFLRSHKNIDFDGEER                  | W (1)                                        | VFDNWLHLHNKSSATIRDYLNLNK                                                                                                                   |
| Avr1b     | 29%                         | AG_53 (4)             | 138               | 29                            |                              | RFLRAHEEDDAGER                    | W (1)                                        | AYEKWAKKGYSLDKIKNWLAIADP                                                                                                                   |
