# Supplementary material
Source: PubMed Central journal article supplement (PMC2290801)
Supplement: pnas_0709303105_14.pdf [file pnas_0709303105_14.pdf]

**Table 5. Positive selection detected in the highly similar paralogs groups**

| Paralog group* | Number of <i>Avh</i> genes | <i>Avh</i> genes belonging to the paralog group | dN <sup>†</sup> | dS <sup>‡</sup> | dN/dS | Number of positively selected sites <sup>§</sup> | Positively selected amino acid residues | Positively selected AA in signal peptides | Positively selected AA in RXLR-dEER domain | Positively selected AA in the C-terminal region |
|----------------|----------------------------|-------------------------------------------------|-----------------|-----------------|-------|--------------------------------------------------|-----------------------------------------|-------------------------------------------|--------------------------------------------|-------------------------------------------------|
| ParalogGroup_1 | 3                          | PsAvh_295 PsAvh_378<br>PsAvh_379                | 0.01            | 0.04            | 0.38  | 0                                                | none                                    |                                           |                                            |                                                 |
| ParalogGroup_2 | 3                          | PrAvh_229 PrAvh_248<br>PrAvh_90                 | 0.01            | 0.01            | 1.68  | 2                                                | W48 S71                                 | 0                                         | 2                                          | 0                                               |
| ParalogGroup_3 | 3                          | PrAvh_18 PrAvh_84 PrAvh_9                       | 0.00            | 0.00            | nd    | 7                                                | T138 N171 S176 R190 K192 S203<br>F216   | 0                                         | 0                                          | 7                                               |
| ParalogGroup_4 | 3                          | PrAvh_165 PrAvh_281<br>PrAvh_67                 | 0.02            | 0.02            | 1.08  | 3                                                | N29 A63 V147                            | 0                                         | 2                                          | 1                                               |
| ParalogGroup_5 | 3                          | PrAvh_181 PrAvh_287<br>PrAvh_319                | 0.02            | 0.03            | 0.47  | 0                                                | none                                    |                                           |                                            |                                                 |
| ParalogGroup_6 | 3                          | PrAvh_305 PrAvh_308<br>PrAvh_309                | 0.01            | 0.01            | 1.64  | 0                                                | none                                    |                                           |                                            |                                                 |
| ParalogGroup_7 | 3                          | PrAvh_274 PrAvh_275<br>PrAvh_335                | 0.01            | 0.01            | 1.73  | 1                                                | F136                                    | 0                                         | 0                                          | 1                                               |
| ParalogGroup_8 | 3                          | PrAvh_213 PrAvh_218<br>PrAvh_220                | 0.00            | 0.00            | nd    | 0                                                | none                                    |                                           |                                            |                                                 |
| ParalogGroup_9 | 3                          | PrAvh_109 PrAvh_110                             | 0.02            | 0.03            | 0.50  | 0                                                | none                                    |                                           |                                            |                                                 |

| Paralog group*  | Number of Avh genes | Avh genes belonging to the paralog group          | dN <sup>+</sup> | dS <sup>+</sup> | dN/dS | Number of positively selected sites <sup>§</sup> | Positively selected amino acid residues                          | Positively selected AA in signal peptides | Positively selected AA in RXLR-dEER domain | Positively selected AA in the C-terminal region |
|-----------------|---------------------|---------------------------------------------------|-----------------|-----------------|-------|--------------------------------------------------|------------------------------------------------------------------|-------------------------------------------|--------------------------------------------|-------------------------------------------------|
| 9               |                     | PrAvh_111                                         |                 |                 |       |                                                  |                                                                  |                                           |                                            |                                                 |
| ParalogGroup_10 | 4                   | PsAvh_277 PsAvh_299 PsAvh_300 PsAvh_301           | 0.01            | 0.01            | 1.42  | 0                                                | none                                                             |                                           |                                            |                                                 |
| ParalogGroup_11 | 4                   | PrAvh_240 PrAvh_262 PrAvh_265 PrAvh_286           | 0.01            | 0.02            | 0.91  | 0                                                | none                                                             |                                           |                                            |                                                 |
| ParalogGroup_12 | 4                   | PrAvh_131 PrAvh_132 PrAvh_138 PrAvh_139           | 0.02            | 0.03            | 0.50  | 0                                                | none                                                             |                                           |                                            |                                                 |
| ParalogGroup_13 | 4                   | PsAvh_7a PsAvh_7b1 PsAvh_7b2 PsAvh_7c             | 0.01            | 0.01            | 0.56  | 0                                                | none                                                             |                                           |                                            |                                                 |
| ParalogGroup_14 | 4                   | PrAvh_131 PrAvh_132 PrAvh_138 PrAvh_139           | 0.02            | 0.03            | 0.50  | 0                                                | none                                                             |                                           |                                            |                                                 |
| ParalogGroup_15 | 5                   | PrAvh_302 PrAvh_303 PrAvh_304 PrAvh_306 PrAvh_307 | 0.03            | 0.03            | 0.96  | 13                                               | D145 T159 E209 G223 E228 L230 H231 G236 Y239 R240 M242 T249 K252 | 0                                         | 0                                          | 13                                              |
| ParalogGroup_16 | 5                   | PrAvh_178 PrAvh_179 PrAvh_190 PrAvh_195 PrAvh_235 | 0.03            | 0.02            | 1.12  | 6                                                | N105 L107 A130 H132 I133 E134                                    | 0                                         | 0                                          | 6                                               |
| ParalogGroup_   | 6                   | PrAvh_148 PrAvh_187                               | 0.02            | 0.06            | 0.36  | 0                                                | none                                                             |                                           |                                            |                                                 |

| Paralog group*     | Number of Avh genes | Avh genes belonging to the paralog group | dN <sup>†</sup> | dS <sup>‡</sup> | dN/dS | Number of positively selected sites <sup>§</sup> | Positively selected amino acid residues                                                  | Positively selected AA in signal peptides | Positively selected AA in RXLR-dEER domain | Positively selected AA in the C-terminal region |
|--------------------|---------------------|------------------------------------------|-----------------|-----------------|-------|--------------------------------------------------|------------------------------------------------------------------------------------------|-------------------------------------------|--------------------------------------------|-------------------------------------------------|
| 17                 |                     | PrAvh_361 PrAvh_364<br>PrAvh_65 PrAvh_85 |                 |                 |       |                                                  |                                                                                          |                                           |                                            |                                                 |
| Avr1b <sup>¶</sup> | 5                   | P6954 P7064 P7074 P7076<br>P7081         | 0.02            | 0.01            | 3.00  | 18                                               | L3 V69 A77 K80 A87 K94 E97 K98 I<br>G103 S105 D107 K108 N111 Q120<br>D125 N129 L135 S138 |                                           | 0                                          | 18                                              |
| ELI <sup>¶¶</sup>  | 6                   | SOJ1A SOJ1B SOJ1C SOJ1D<br>SOJ1E SOJ1F   | 0.51            | 4.91            | 0.10  | 0                                                | None                                                                                     |                                           |                                            |                                                 |

\*Paralog groups sharing [mt]90% nucleotide sequence identity are grouped together.

<sup>†</sup>dN represents the rate of nonsynonymous nucleotide substitution per nonsynonymous sites estimated by the codeml program of the PAMLv3.14 package.

<sup>‡</sup>dS represents the rate of synonymous nucleotide substitution per synonymous sites estimated by the codeml program of the PAMLv3.14 package.

<sup>§</sup>Positively selected amino acid sites were assigned based on a probability >95% with Bayes empirical Bayes statistics.

<sup>¶</sup>The analysis of Avr1b was performed with the four alleles present in the *P. sojae* population (1).

<sup>¶¶</sup>The analysis of ELI1 was performed with the close paralogs of *soj* genes (2).

1. Shan W, Cao M, Leung D, Tyler BM (2004) The Avr1b locus of *Phytophthora sojae* encodes an elicitor and a regulator required for avirulence on soybean plants carrying resistance gene Rps1b. *Mol Plant Microbe Interact* 17:394–403.

2. Jiang RHY, Tyler BM, Govers F (2006) Comparative analysis of *Phytophthora* genes encoding secreted proteins reveals conserved synteny and lineage-specific gene duplications and deletions. *Mol Plant-Microbe Interact* 19:1311-1321.
