# Supplementary material
Source: PubMed Central journal article supplement (PMC2290801)
Supplement: pnas_0709303105_15.pdf [file pnas_0709303105_15.pdf]

**Table 6. Ortholog pairs of *Avh* genes**

| Ortholog pair | <i>P. ramorum</i><br>Avh | <i>P. sojae</i> Avh | dN   | dS   | dN/dS* |
|---------------|--------------------------|---------------------|------|------|--------|
| 1             | PrAvh_5                  | PsAvh_189           | 0.20 | 1.31 | 0.15   |
| 2             | PrAvh_7                  | PsRF_33             |      |      |        |
| 3             | PrAvh_21                 | PsAvh_269           | 0.40 | 2.06 | 0.19   |
| 4             | PrAvh_25                 | PsAvh_180           |      |      |        |
| 5             | PrAvh_30                 | PsAvh_31            | 0.26 | 1.92 | 0.14   |
| 6             | PrAvh_43                 | PsAvh_184           |      |      |        |
| 7             | PrAvh_44                 | PsAvh_65            | 0.49 | 1.54 | 0.32   |
| 8             | PrAvh_53                 | PsAvh_29            | 0.54 | 1.62 | 0.33   |
| 9             | PrAvh_55                 | PsAvh_260           | 0.56 | 2.26 | 0.25   |
| 10            | PrAvh_58                 | PsAvh_340           | 0.29 | 2.56 | 0.11   |
| 11            | PrAvh_60                 | PsAvh_261           | 0.42 | 1.23 | 0.34   |
| 12            | PrAvh_61                 | PsAvh_240           |      |      |        |
| 13            | PrAvh_63                 | PsAvh_182           | 0.48 | 2.83 | 0.17   |
| 14            | PrAvh_66                 | PsAvh_95            | 0.33 | 3.24 | 0.10   |
| 15            | PrAvh_72                 | PsAvh_137           | 0.46 | 1.34 | 0.34   |

|    |           |           |      |      |      |  |
|----|-----------|-----------|------|------|------|--|
| 16 | PrAvh_77  | PsAvh_42  |      |      |      |  |
| 17 | PrAvh_81  | PsAvh_350 |      |      |      |  |
| 18 | PrAvh_95  | PsAvh_66  | 0.37 | 1.77 | 0.21 |  |
| 19 | PrAvh_103 | PsRF_51   |      |      |      |  |
| 20 | PrAvh_115 | PsAvh_256 | 0.51 | 1.44 | 0.35 |  |
| 21 | PrAvh_130 | PsAvh_75  | 0.33 | 2.43 | 0.14 |  |
| 22 | PrAvh_145 | PsAvh_219 | 0.57 | 5.67 | 0.10 |  |
| 23 | PrAvh_160 | PsAvh_265 |      |      |      |  |
| 24 | PrAvh_170 | PsRF_54   |      |      |      |  |
| 25 | PrAvh_193 | PsAvh_246 |      |      |      |  |
| 26 | PrAvh_194 | PsAvh_254 | 0.55 | 2.47 | 0.22 |  |
| 27 | PrAvh_215 | PsAvh_38  |      |      |      |  |
| 28 | PrAvh_222 | PsAvh_144 |      |      |      |  |
| 29 | PrAvh_223 | PsAvh_145 |      |      |      |  |
| 30 | PrAvh_280 | PsAvh_17  | 0.39 | 4.96 | 0.08 |  |
| 31 | PrAvh_285 | PsAvh_227 |      |      |      |  |
| 32 | PrAvh_290 | PsAvh_366 | 0.53 | 1.07 | 0.49 |  |

\*dN/dS is estimated with the pairwise sequence analysis of the codeml program of the PAML v3.14 package. The dN/dS value is only estimated from the sequences that can be aligned properly in frame.
