# Supplementary material
Source: PubMed Central journal article supplement (PMC2290801)

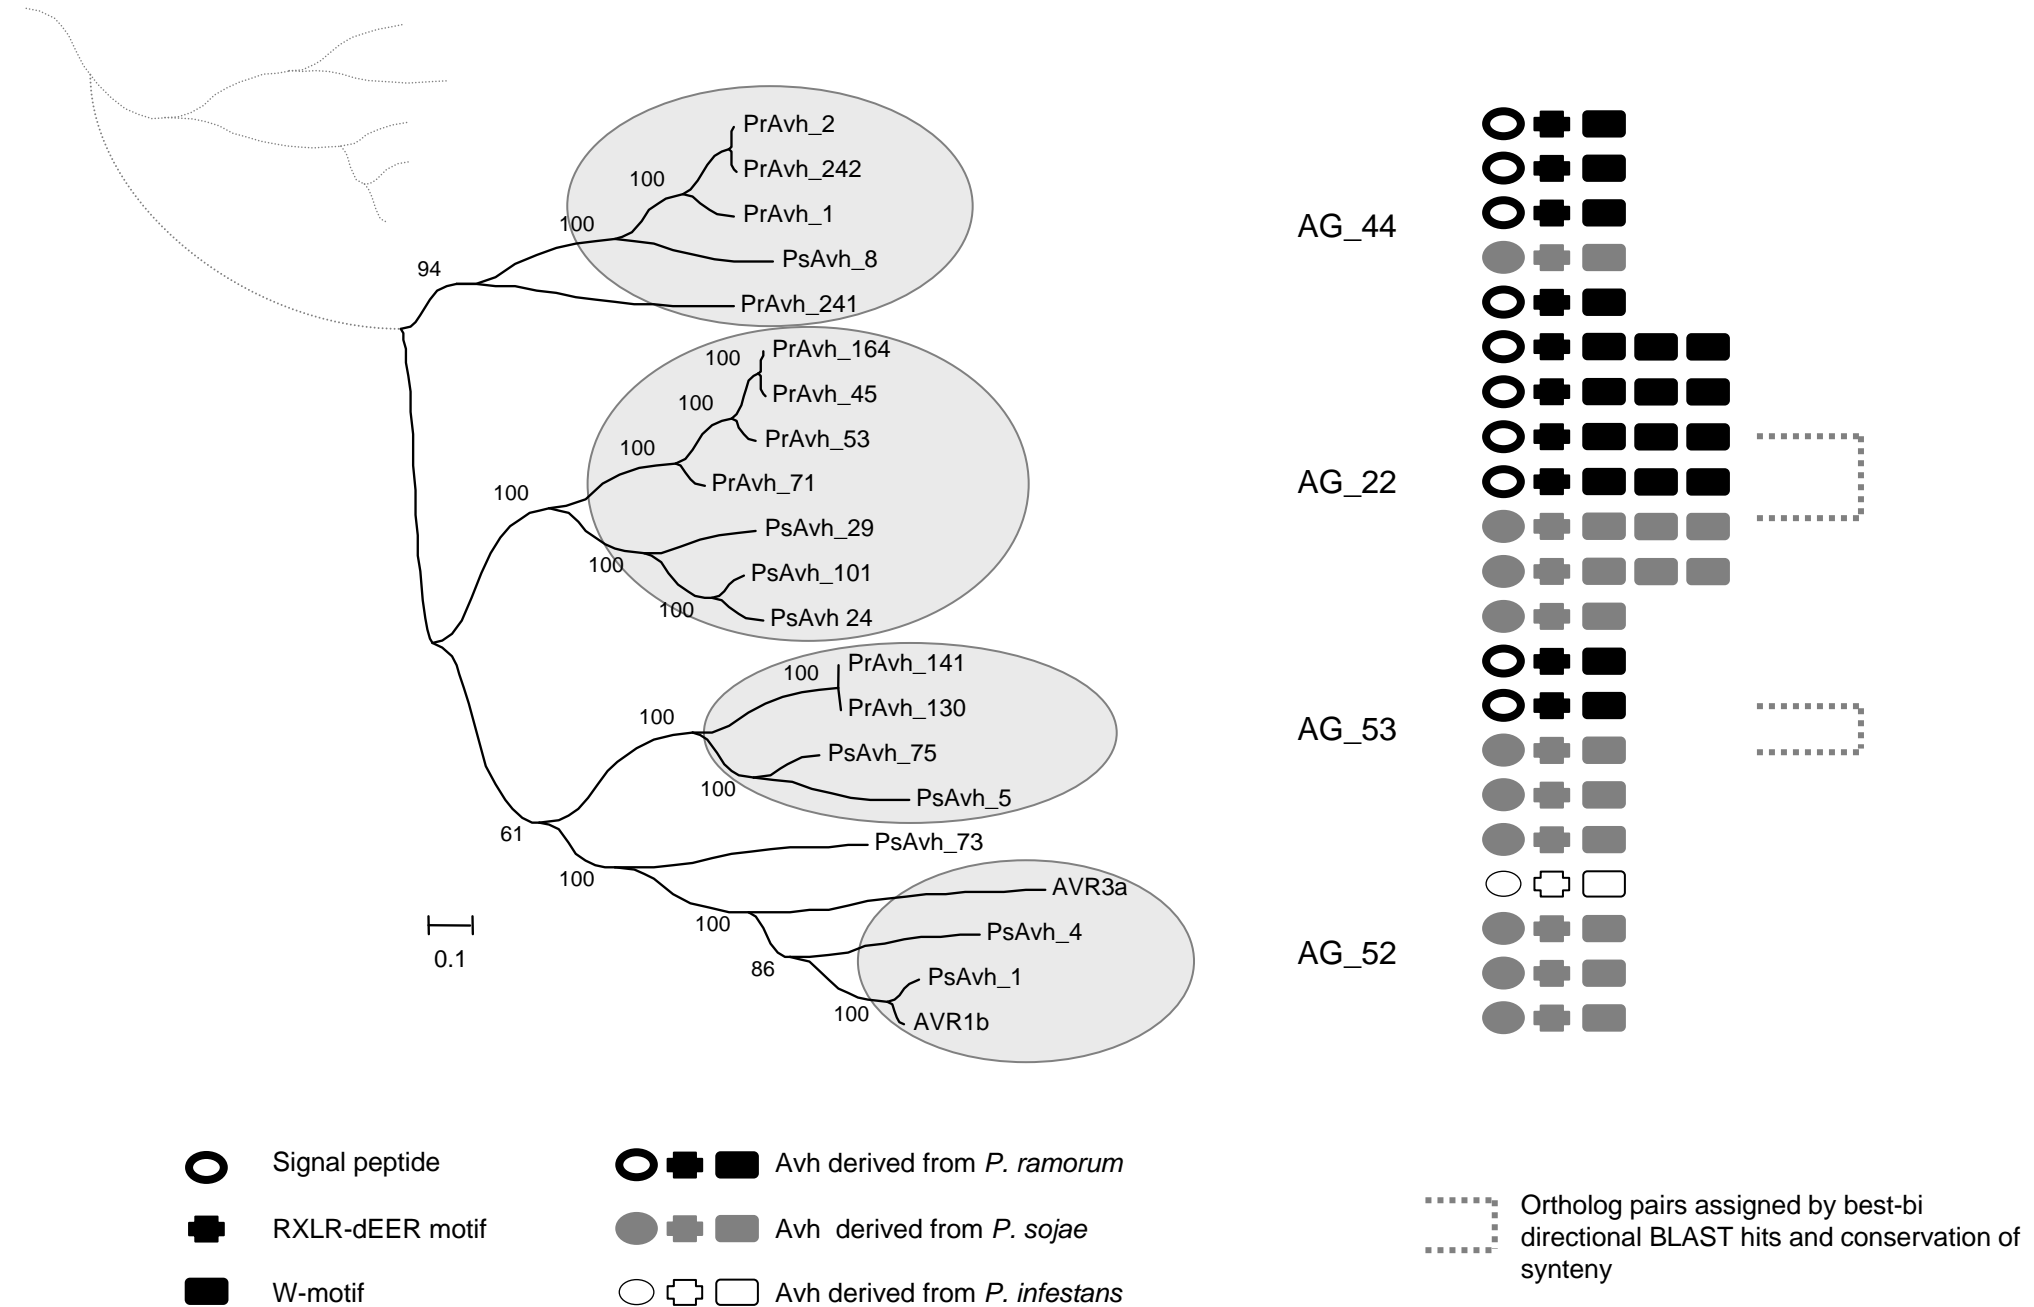

Supplement: pnas_0709303105_10.pdf [file pnas_0709303105_10.pdf]

A

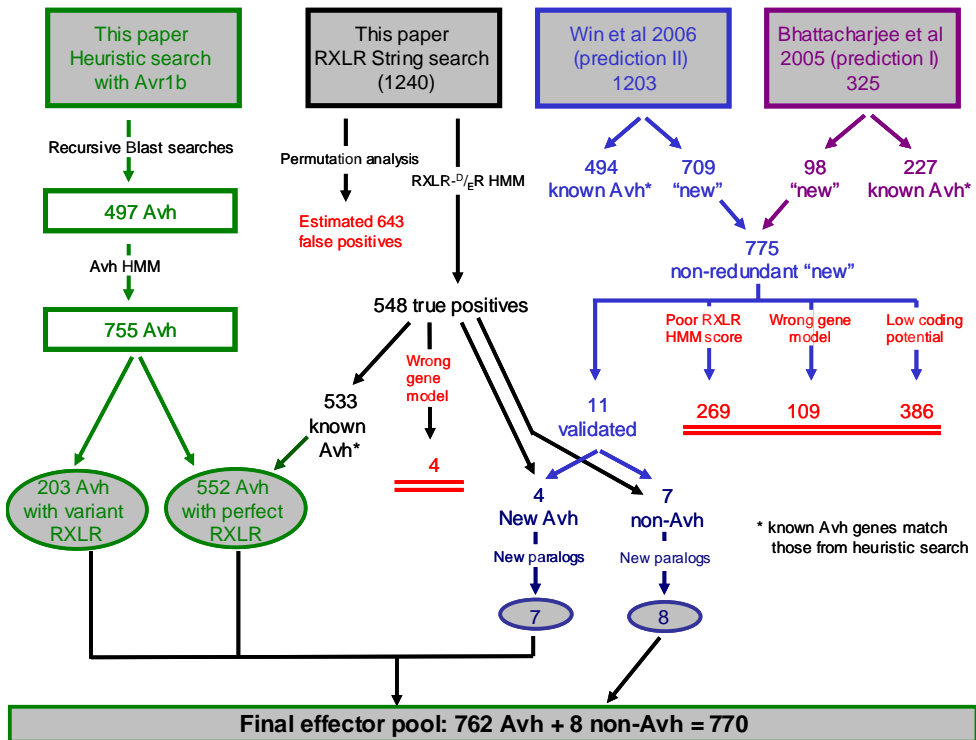

B

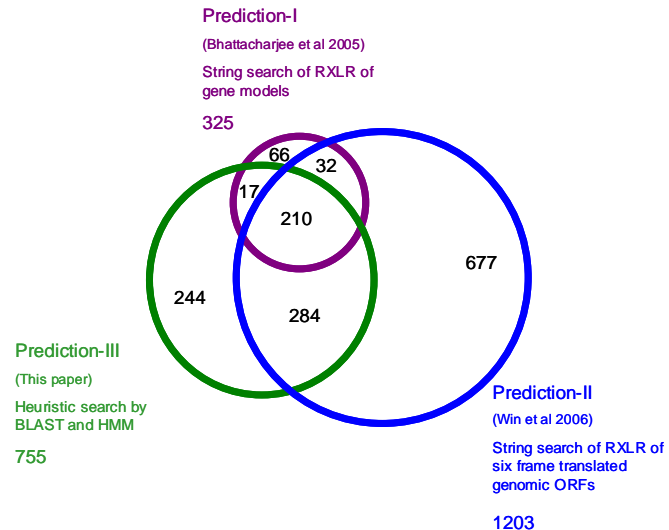

Supplement: pnas_0709303105_4.pdf [file pnas_0709303105_4.pdf]

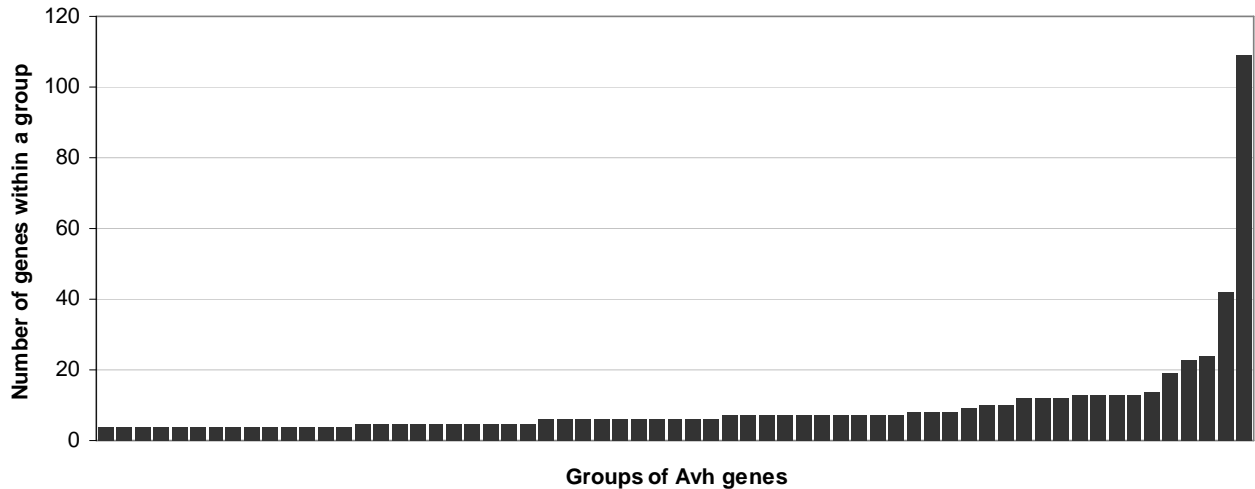

Supplement: pnas_0709303105_5.pdf [file pnas_0709303105_5.pdf]
